# Supplementary material
Source: publisher figshare collection journal article supplement (https://acs.figshare.com/ndownloader/files/5142418)
Supplement: Supplementary file 1 [file 5142418]

**Authors:** Xiong, Z.; Xu, Y\*.; Zhu, L.; Zhao, J.

**Title:** Photosensitized Oxidation of Substituted Phenols on Aluminum Phthalocyanine-Intercalated Organoclay

**Number of Manuscript:** ES0487630

**Number of Pages:** manuscript was 24.

**Number of Figures:** 2

**Number of Tables:** 1

---

**TABLE S1. Physicochemical Properties of Phenol and Substituted Phenols Used in the Study**

| <b>Organic substrate</b>  | <b>Phenol</b> | <b>4-NP</b> | <b>4-CP</b> | <b>2,4-DCP</b> | <b>2,4,6-TCP</b> |
|---------------------------|---------------|-------------|-------------|----------------|------------------|
| Molecular weight          | 94.11         | 139.11      | 128.56      | 163.00         | 197.45           |
| Solubility in water (g/L) | 93            | 16          | 27.1        | 4.5            | 0.8              |
| Log $K_{ow}$ <sup>a</sup> | 1.46          | 1.91        | 2.39        | 3.06           | 3.87             |
| $pK_a$                    | 10.0          | 7.16        | 9.41        | 7.89           | 6.23             |

<sup>a</sup>  $K_{OW}$  represents the octanol-water partition coefficient.

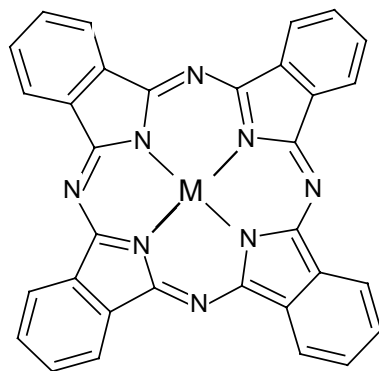

where M=Al(III), Cu(II), Co(II)

**FIGURE S1. The Molecular Structure of MPC**

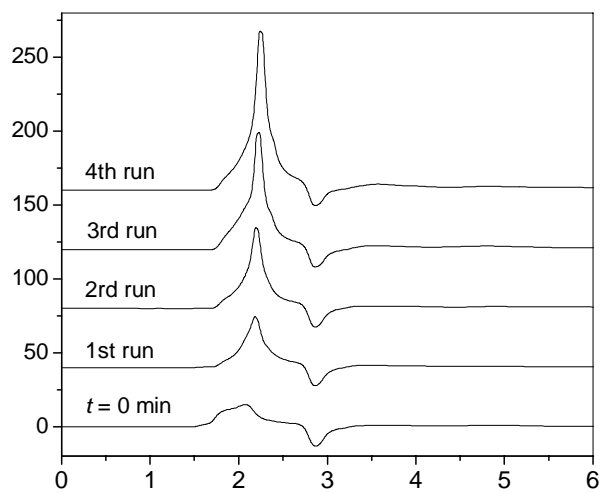

**FIGURE S2. The HPLC traces of the corresponding filtrates in Figure 9 after each run was completed.**
